1        **Neural mechanisms underlying the temporal control of**  
2        **sequential saccade planning in the frontal eye fields.**

3  
4

5                    **Debaleena Basu<sup>1\*</sup>, Naveen Sendhilnathan<sup>2</sup>, Aditya Murthy<sup>1</sup>**

6        <sup>1</sup>Centre for Neuroscience, Indian Institute of Science, Bengaluru, Karnataka 560012, India

7        <sup>2</sup>Department of Neuroscience, Columbia University in the City of New York, NY 10027,  
8                    USA

9                    \*Corresponding author: Dr. Debaleena Basu; e-mail: basu.debaleena@gmail.com

10  
11  
12

13        Abbreviated title: Temporal control of sequential saccades

14

15        Number of pages: 42;

16        Number of figures: 6,

17        Number of supplementary figures: 6

18  
19

20 **Summary:**

21 Sequences of saccadic eye movements are instrumental in navigating our visual  
22 environment. While neural activity has been shown to ramp up to a threshold before single  
23 saccades, the neural underpinnings of multiple saccades is unknown. To understand the  
24 neural control of rapid saccade sequences, we recorded from the frontal eye field (FEF) of  
25 macaque monkeys while they performed a sequential saccade task. We show that concurrent  
26 planning of two saccade plans brings forth processing bottlenecks, specifically by decreasing  
27 the growth rate and increasing the threshold of saccade-related ramping activity. The rate  
28 disruption affected both saccade plans, and a computational model wherein activity related to  
29 the two saccade plans bilaterally and asymmetrically inhibited each other, predicted the  
30 behavioral and neural results observed experimentally. Borrowing from models in  
31 psychology, our results demonstrate a capacity-sharing mechanism of processing bottlenecks,  
32 wherein multiple saccade plans in a sequence, compete for the processing capacity by  
33 perturbation of the saccade-related ramping activity. Finally, we show that in contrast to  
34 movement related neurons, visual activity in FEF neurons is not affected by the presence of  
35 multiple saccade targets, indicating that for perceptually simple tasks, inhibition amongst  
36 movement-related neurons mainly instantiates capacity sharing. Taken together, we show  
37 how psychology-inspired models of capacity sharing can be mapped onto neural responses to  
38 understand the control of rapid saccade sequences.

39

40 **Keywords:** motor sequences, oculomotor control, electrophysiology, processing bottlenecks

41

## 42 **Introduction:**

43 Saccadic eye movements shift the fovea from one point to another, serially sampling  
44 our visual surroundings, and aiding consequent behavior. Proper planning and execution of  
45 saccade sequences is essential for performing everyday tasks such as reading. Despite  
46 extensive research on the neural basis of planning individual saccades, the neural  
47 mechanisms underlying the sequencing of multiple saccades remain largely unknown.  
48 Previous research has shown that sequential saccades can be processed in parallel (Basu and  
49 Murthy, 2020; Becker and Jürgens, 1979; Bhutani et al., 2012; Bhutani et al., 2013; McPeck  
50 et al., 2003; McPeck and Keller, 2002; McPeck et al., 2000; Minken et al., 1993; Phillips and  
51 Segraves, 2010; Port and Wurtz, 2003; Ray et al., 2004; Sharika et al., 2008; Shen and Paré,  
52 2014; Tian et al., 2000; Wu et al., 2013). Sequential saccade studies have shown that as the  
53 temporal gap between the targets (TSD; target step delay) decreases, the latency of the  
54 response to the second stimulus increases markedly, as if the brain inherently cannot process  
55 two simple decisions at the same time (Pashler, 1994; Marois and Ivanoff, 2005; Ray et al.,  
56 2012; Ray et al., 2004; Ruthruff et al., 2001). The bottlenecks associated with parallel  
57 programming of multiple saccade plans form the basis of this study.

58 Various theoretical frameworks have been proposed to explain how closely spaced  
59 action plans interfere with each other. Single-channel bottleneck models propose that a  
60 central, decision-making stage constitutes the bottleneck, wherein the central stages of  
61 multiple plans can only proceed serially and cannot be ‘co-active’ (Pashler, 1994; Ruthruff et  
62 al., 2001; Welford, 1967; Welford, 1952). For a sequence of two saccades, the first plan is  
63 likely to reach the central stage first, and thus the saccade 2 plan must ‘wait’ till central  
64 processing of the first is over (**Fig. 1A**). In contrast, capacity-sharing models argue that the  
65 decision-making stages of both plans can proceed in parallel, albeit with differential rates.  
66 The concept of the brain’s ‘capacity’ corresponds to the brain’s general information  
67 processing capabilities (Broadbent, 1971; Gopher and Navon, 1980; Kahneman, 1973;  
68 McLeod, 1977), independent of task type. The capacity-sharing models predict that because  
69 of its temporal precedence, the first saccade plan will get the major share of the capacity and  
70 the second saccade plan will get a smaller fraction, thus delaying the onset of the second  
71 response (**Fig. 1B**; Navon and Miller, 2002; Tombu and Jolicœur, 2003).

72 The neural mechanisms of processing bottlenecks in sequential saccade planning are  
73 not known. To investigate the neural architecture of saccade-related bottlenecks, we recorded  
74 neural activity from the frontal eye field (FEF) of macaque monkeys performing a sequential

75 saccade task. FEF is a good candidate region to study the neural imprints of processing  
76 bottlenecks since it is a higher-order control center for goal-directed saccadic planning  
77 (Sendhilnathan et al., 2021; Sendhilnathan et al., 2017, 2020). Further, the activity of FEF  
78 movement neurons follow the dynamics of accumulator models and resemble the central  
79 capacity-limited stage observed in computational models of dual-task studies (Hanes and  
80 Schall, 1996; Ray et al., 2012; Sigman and Dehaene, 2005). Finally, FEF movement neurons  
81 can encode two saccade plans in parallel (Basu and Murthy, 2020), and thus, any limitations  
82 arising during the concurrent programming of saccades may be found in the activity of  
83 movement-related neurons in the FEF. Our results show that FEF movement neurons  
84 constitute a bottleneck locus—the processing of saccadic sequences is slowed down by  
85 reducing the speed of activity growth or by increasing movement activation threshold. Such  
86 adjustments were observed for both the first and second saccade plans, indicating that a  
87 capacity-sharing mechanism might underlie temporal delays seen during the sequencing of  
88 multiple actions.

89

## 90 **Results:**

91 Two monkeys, a *Macaca radiata* (J) and a *Macaca mulatta* (G) performed a  
92 sequential saccade ‘FOLLOW’ task (**Fig. S1**; see methods), where the majority (70%) of the  
93 trials were ‘step trials’ in which they had to perform a rapid sequence of saccades to two  
94 targets in the order of their presentation. The remaining 30% of the trials were ‘no-step’  
95 trials, wherein a single visual target was presented, and the monkeys had to make a single  
96 saccade to it. The two types of trials were randomly interleaved. The temporal gap (target  
97 step delay or TSD) between the first and second target onsets in step trials was randomly  
98 chosen among 17 ms, 83 ms, and 150 ms (Basu and Murthy, 2020).

99

## 100 **Behavioral evidence of processing bottlenecks during sequential saccades**

101 In the scheme of single-channel bottleneck models, the second plan shows the  
102 hallmark of processing bottlenecks: increase in latencies with decrease in TSD, whilst the  
103 saccade 1 latencies (RT1) stay unaffected (**Fig 1C** left). However, unlike the single-channel  
104 bottleneck model, where plan 1 may be assumed to get 100% of the capacity, the capacity-  
105 sharing model predict that the latencies of the first saccade (RT1) will also increase as it only  
106 gets a part of the full available capacity (**Fig 1C** right).

107 To ensure that the behavioral data are matched to the neural data, we analyzed trials in  
108 which saccades were made into the response field (RF; see methods). That is, for RT1, the  
109 first saccade was made into the RF, and for RT2, the second saccade was made into the RF.  
110 Both RT1 and RT2 slowed down as the TSD decreased, indicating a capacity-sharing  
111 mechanism (**Fig. 1D**; RT1: Kruskal-Wallis,  $\chi^2(2, 240) = 17.85, p < .001, \eta^2 = 0.07$ ; RT2:  
112 Kruskal-Wallis,  $\chi^2(2, 233) = 158.37, p < .001, \eta^2 = 0.67$ ). While the effect on RT1 was  
113 typically much smaller than that on RT2, the increases in saccade latencies with decreasing  
114 TSD corroborated with previously well-established evidence of processing bottlenecks in  
115 concurrent action planning. Our behavioral data, thus, supports the presence of a capacity-  
116 sharing bottleneck as opposed to the single-channel bottleneck as the first saccade plan does  
117 not stay unaffected.

118

### 119 **Movement-related activity during single saccades:**

120 Previous work has shown that the pattern of activity of FEF movement neurons are  
121 correlated with stochastic accumulation, which is widely used in computational models of  
122 saccadic reaction times (Boucher et al., 2007; Hanes and Schall, 1996; Ratcliff et al., 2007;  
123 Woodman et al., 2008) and are directly linked to saccade initiation times (Huerta et al., 1986;  
124 Langer and Kaneko, 1990; Segraves, 1992). Since reaction time lengthening is the main  
125 behavioral evidence of processing bottlenecks, movement neurons are well projected to carry  
126 neural correlates of the same. To confirm whether movement-related activity in FEF adheres  
127 to an accumulation-to-threshold model of reaction time, we first studied the no-step single-  
128 saccade trials. We divided these trials into fast, medium, and slow reaction time groups and  
129 we measured the parameters of accumulator models from the movement activity (**Fig. S2A**).  
130 The reaction time grouping was obtained by partitioning reaction times in each session using  
131 the mean reaction time of that session (see methods). The main parameters of accumulator  
132 models, i.e., baseline, onset, growth rate, and threshold activity were measured for the three-  
133 reaction time conditions (fast, medium, slow), for each neuron (**Fig. S2C-F**; see methods).  
134 Consistent with the earlier studies (Hanes and Schall, 1996), adjustments in the rate of growth  
135 of activity of the movement neuron population predicted reaction times in the no-step trials:  
136 across the movement neuron population, the slope of the best fitting line for growth rate  
137 variation in the reaction time groups was significantly different from zero ( $Z_{\text{rate}} = -4.27, p <$   
138  $.001$ ; **Fig. S2E**). Further, the slopes for the growth rate were negative, indicating that fast  
139 reaction times were preceded by a steeper rate of growth of movement activity and vice  
140 versa. While the growth rate varied with reaction time, the threshold did not ( $Z_{\text{threshold}} = -0.98,$

141  $p = .323$ ; **Fig. S2F**), corroborating with the established reaction time models of accumulation  
142 to a fixed threshold. The slope distributions of other accumulator measures like baseline, and  
143 onset, were not statistically significant from zero ( $Z_{\text{baseline}} = -2.04$ ,  $p = 0.05$ ;  $Z_{\text{onset}} = 1.92$ ,  $p =$   
144  $0.054$ ).

145

#### 146 **Processing bottlenecks underlie the representation of sequential saccades:**

147 Using a computational model, Sigman and Dehaene (2005) had shown that evidence  
148 accumulation, representing a central decision process, constituted a bottleneck in dual-tasks,  
149 while the perceptual stage and the execution stage did not. Based on the mapping between  
150 accumulator models and movement neuron dynamics, four possible hypotheses (**Fig. S2A**)  
151 can explain how the activity of FEF movement neurons coding for the second saccade might  
152 bring about the systematic increase of the latency of the second saccade (RT2) with decrease  
153 in TSD that characterizes processing bottlenecks. The lengthening of reaction time may be  
154 due to (1) lowering of the baseline firing rate with shorter TSDs (2) delaying of the onset of  
155 the activity related to the second saccade with shorter TSDs (3) reduced growth rate of the  
156 activity with shorter TSDs (4) and an increase of the saccade threshold firing rate with larger  
157 TSDs.

158 **Fig. 2** schematically shows the possible modulations of the accumulation process in  
159 the planning stage (P) and the corresponding movement neuron activity. The accumulation  
160 process is represented as a noisy integrator accumulating visual evidence till it reaches the  
161 threshold. In the single-channel bottleneck model, RT1 is unaffected, and thus the dynamics  
162 of the integrator and the corresponding neural activity will be unchanged across the three  
163 TSDs (**Fig. 2A**). For RT2, the single-channel bottleneck model posits a postponement of the  
164 central stage, thus the onset of the accumulating process and of the neural activity will get  
165 delayed as the overlap between the two saccade plans increases from long to short TSD (**Fig.**  
166 **2B**). According to the capacity-sharing model, the first and second saccade plans can proceed  
167 in parallel; thus, there is no ‘waiting period’ for the accumulation process of the second  
168 plan—the onset of neural activity will be similar across TSDs for both first and second  
169 saccade. However, since both motor plans share the limited processing capacity, the central  
170 stages of both plans will be lengthened. This may be brought about by a decrease in the rate  
171 of integration from long to short TSD, or an increase in the decision threshold. At the level of  
172 neural activity, the rate of ramping up of movement-related activity may slow down, or the  
173 threshold firing rate for saccade onset may increase to account for the increase in saccade  
174 latencies with decrease in TSD. Critically, the rate and/or threshold modulation will be

175 present for both saccade plans according to the capacity-sharing model, although the effect  
176 may be lesser for the first plan as the corresponding increase in RT1 is also less (**Fig. 2C** &  
177 **Fig. 2D**). While we have presented polarized scenarios for the two bottleneck models, it is  
178 possible that at the population level, there would a combination of the factors mentioned.

179 To assess which of the above possibilities explain the increase in RT2, we analyzed  
180 the neural activity in trials where the second saccade was made into the RF (RF<sub>in</sub> trials; see  
181 methods) for all three TSDs (**Fig. 3A**; see **Fig S3** for single neuron example). Across the  
182 population, the rate of neural activity growth slowed down from long to short TSD, and the  
183 activity ramped up to a higher firing rate threshold. We measured each of the four  
184 accumulator parameters: baseline, onset, rate, and threshold (averaged across trials of the  
185 same TSD) for the three TSD conditions, for each neuron (**Fig. 3B**; see methods) using linear  
186 regression. The slopes from all the movement neurons were compared using a Wilcoxon  
187 signed-rank test. Across the movement neuron population, the slopes of the rate and the  
188 threshold, as a function of TSD were significantly different from zero ( $Z_{\text{rate}} = 4.27$ ,  $p < .001$ ;  
189  $Z_{\text{threshold}} = -2.67$ ,  $p < 0.01$ ; **Fig. 3B**). Further, the slopes for the rate of activity growth were  
190 positive, indicating that the rate of activity grew faster at longer TSDs, where presumably the  
191 effect of processing bottlenecks was the least among the three TSD conditions. Threshold  
192 slopes were significantly negative, indicating that as the TSD increased, the threshold  
193 required for initiation of the second saccade was reduced at the population level. However,  
194 the slope distributions of other accumulator measures like baseline, and onset, were not  
195 statistically significant from zero ( $Z_{\text{baseline}} = -0.62$ ,  $p = 0.53$ ;  $Z_{\text{onset}} = 0.86$ ,  $p = 0.17$ ). Thus,  
196 processing bottlenecks at the level of FEF movement neurons were characterized by  
197 multifaceted adjustments in the rate and threshold of the activity related to S2.

198 While the classical evidence of processing bottlenecks is indexed by the increase in  
199 RT2, RT1 may also be affected according to the capacity-sharing scheme of processing  
200 bottlenecks (**Fig. 1B**). We tested whether movement-related activity encoding first saccade  
201 remained unchanged as would be expected in the single-channel bottleneck scheme, or  
202 changed systematically, across TSDs as the capacity-sharing model predicted. To address this  
203 issue, we performed the same analyses as before but for the condition in which the first  
204 saccade was made into the RF (RF<sub>out</sub> trials; **Fig 3C**; see **Fig S3** for single neuron example).  
205 At the population level, rate perturbation occurred with decrease in TSD in the first plan,  
206 mirroring the modulation observed for the second plan (Wilcoxon signed-rank test for slopes  
207 of rates,  $Z_{\text{rate}} = 3.62$ ,  $p < .001$ ; **Fig 3D**). However, unlike the second plan, threshold activity

208 did not show a significantly decreasing relation with TSD ( $Z_{\text{threshold}} = 1.16$ ,  $p = 0.25$ ). Slope  
209 distributions of other accumulator measures like baseline, and onset, were not statistically  
210 significant from zero ( $Z_{\text{baseline}} = 0.85$ ,  $p = 0.39$ ;  $Z_{\text{onset}} = 1.04$ ,  $p = 0.29$ ; **Fig 3D**). Thus, rate  
211 perturbation constituted a major mechanism through which the ramping up of activity of FEF  
212 movement neurons was controlled during parallel planning of sequential saccades.

213

### 214 **State space dynamics and inhibitory control may enable capacity sharing during** 215 **sequential saccade planning**

216 To gain deeper insights into neural mechanisms underlying capacity sharing, we  
217 studied the population dynamics underlying the trajectory of neural activity in FEF. First, we  
218 visualized this by performing a principal component analysis (PCA) separately for the  
219 population neural activity (for saccades into RF) aligned to target 1 and target 2 onsets for  
220 each of the three TSDs (**Fig 4A**). PCA is a commonly used unsupervised learning algorithm  
221 to extract the latent information from the data (see methods). This method allows us to look  
222 at the high dimensional FEF population neural activity in a much lower dimension that  
223 captures the maximum variance of the population. At least  $\sim 7$ -8 PCs were required to  
224 explain  $>99\%$  of the variance for any of the six conditions (three TSDs, two plans; although  
225 there was a trend of fewer PCs explaining more variance as TSD increased). However, the  
226 top three PCs explain  $>90\%$  variance. Therefore, we visualized a ‘state-space trajectory’ by  
227 plotting the top three PCs versus one another (**Fig 4B**). Each point on the trajectory indicates  
228 the neural state at each time point.

229 If planning for the first and the second saccades are processed in parallel but compete  
230 for the same shared space due to limited capacity (according to the capacity sharing model),  
231 we should expect the neural trajectories to span different subspaces at shorter TSDs and span  
232 the same subspace at higher TSDs. That is, in the lowest possible TSD, we should expect the  
233 two subspaces to be completely orthogonal (no overlap) and as the TSD increases and  
234 approaches the reaction time of the first saccade, the subspaces can begin to overlap.  
235 Therefore, in our case with the lowest TSD being 17 ms, we should expect a low degree of  
236 overlap and at TSD = 150 ms ( $\sim RT1$ ), we should expect a high degree of overlap. In contrast,  
237 the single-channel bottleneck hypothesis predicts that the subspaces corresponding to the  
238 planning of the first and the second saccades would completely overlap, since the plan 2  
239 would be completely dormant until plan 1 is completed.



240 We found that the neural trajectories significantly differed between the planning of  
241 the first and the second saccades for the shortest TSD but became more similar as the TSD  
242 increased (**Fig 5D**). We quantified the degree of overlap between the subspaces spanned by  
243 these neural trajectories (see methods). At the shortest TSD, the magnitude of overlap  
244 between the signals for planning of the first and the second saccades was 47% and this  
245 increased as the TSD increased from medium (84%) to long TSDs (92%; **Fig 4C**), aligned  
246 more with the predictions of the capacity sharing model. This result also held true for all  
247 saccade directions (**Fig S4**). We also confirmed that these differences were related to the  
248 TSDs and not to differences in saccade kinematics, which were similar across TSDs for the  
249 first and the second saccades (**Fig S5**).

250 Next, we investigated the mechanism behind the differences in the neural subspace  
251 overlap among different TSDs. We performed two sets of simulations (see methods; **S5A-F**)  
252 using the accumulator framework (**Fig S5H**). For each of the two sets, we simulated 40  
253 neurons with 900 trials per neuron (with three types of TSD trials) using a firing rate model  
254 to approximately match the statistical power of our experimental dataset (see methods). We  
255 constructed an inhibition function such that the magnitude of the inhibition inversely varied  
256 with TSD (see methods; **Fig S5G**).

257 In the first set of simulations, we introduced a unilateral inhibition (**Fig 5A**; see  
258 methods). Here, the activities for plan 2 were temporally shifted by plan 1 following the  
259 inhibition curve as a function of TSD. The resulting simulated neural activities (**Fig 5B**)  
260 resembled the predictions of a single-channel bottleneck model (**Fig 2A-B**). Very few (~3)  
261 PCs explained >99% of the variance. The state-space neural trajectories were not  
262 significantly different between planning of the first and the second saccades for any of the  
263 TSDs (**Fig 5C**) as the subspace overlap was 98% between any pair of plans (**Fig 5D**), as  
264 expected from the single-channel bottleneck model.

265 In the next set of simulations, we introduced bilateral, asymmetric mutual inhibition  
266 (see methods; **Fig 5E**). That is plan 1 temporally shifted plan 2 just like before but plan 2  
267 reduced the magnitude of peak firing of plan 1. Hence the nature of inhibition is both bilateral  
268 and asymmetric. The simulations of this model (**Fig 5F**) resembled the neural data (**Fig 3A,**  
269 **C**) and the predictions of a capacity sharing bottleneck model (**Fig 2C-D**). Here, ~ 7-8 PCs  
270 were required to explain >99% of the variance for the shortest TSD and fewer (~5-6) PCs  
271 were required to explain >99% of the variance for the longest TSD. The neural trajectories  
272 significantly differed for short TSD but were similar for longer TSDs (**Fig 5G**) and the  
273 degree of subspace overlap between the two plans increased with TSD, consistent with the

274 structure present in the neural data (**Fig 5H**) resembling the experimental data (**Fig 4C**), as  
275 expected from the capacity sharing model.

276

### 277 **FEF visually-related neurons do not show processing bottlenecks**

278 Previous studies have reported a separation between the visual and motor processing  
279 of FEF neurons with only motor processing affecting reaction time in perceptually simple  
280 tasks (Sato et al., 2001; Thompson et al., 1997; Woodman et al., 2008). Thus, it is plausible  
281 that the responses of visual neurons are not gated by inhibitory bottlenecks. This notion was  
282 tested by analyzing target-related activity in purely visual (**Fig 6A**) and visuomovement  
283 neurons (**Fig 6B**).

284 We analyzed the average target-related response in the 200 ms window following  
285 target onset for each neuron to identify signatures of processing bottlenecks. If target  
286 selection is capacity-limited, then presumably, neural responses encoding saccade targets  
287 appearing in close succession will be inhibited, either due to single-channel bottleneck (only  
288 second target response gets affected) or due to capacity sharing (both first and second target  
289 responses get affected). In contrast to movement-related activity, the average activity in the  
290 target-related period did not vary with TSD (Kruskalwallis:  $\chi^2(2, 129) = 0.47, p = .79$  (first  
291 saccade);  $\chi^2(2, 124) = 0.06, p = .97$  (S2)) for both saccade plans, suggesting that the visual  
292 processing stage is pre-bottleneck, at least of a perceptually simple task like the FOLLOW  
293 task.

294

### 295 **Discussion:**

296 In this study, we explored the limits of parallel processing involved in saccade  
297 sequences. Processing bottlenecks were found within FEF, the mechanisms being rate  
298 perturbation and threshold modulation in the movement neuron population. Additionally, we  
299 found evidence of processing bottlenecks for both motor plans for the first and the second  
300 saccades, suggesting that the associated bottleneck could be a consequence of capacity  
301 sharing between co-activated movement plans. The notion of such shared and limited  
302 processing was also revealed in the state space dynamics of FEF movement activity, which  
303 showed a potential role for inhibitory control that gated access of concurrent motor plans to a  
304 planning subspace. Our analysis of visual activity did not reflect any consistent modulation

305 that could be considered a significant bottleneck. The major results are discussed and  
306 interpreted in the following sections.

307

### 308 **Processing bottlenecks in sequential saccade planning**

309 Processing bottlenecks and parallel programming represent functionally antithetical  
310 processes, and yet both are essential for optimal saccadic behavior. While parallel  
311 programming allows for rapid execution of a saccade sequence, processing bottlenecks are  
312 likely to arise to check unbridled parallel programming of motor plans, as failure to control it  
313 might lead to errors like averaged saccades or incorrect order of execution of a saccade  
314 sequence (Bhutani et al., 2012; Coëffé and O'regan, 1987; Findlay, 1982; Ray et al., 2012;  
315 Viviani and Swensson, 1982; Zambbarbieri et al., 1987). In the context of the current study,  
316 we tested whether a single-channel bottleneck (Pashler, 1994) or a capacity-sharing  
317 bottleneck (Kahneman, 1973) best explained our reaction time data since behavioral evidence  
318 of both the models have been found in dual-task paradigms (Arnell and Duncan, 2002; Navon  
319 and Miller, 2002; Pashler, 1994). In our data, we found evidence of increase in both RT1 and  
320 RT2 with TSD, ruling out the single-channel bottleneck model being the exclusive  
321 framework underlying bottlenecks in sequential saccades. Our neural data also suggested a  
322 capacity-sharing mechanism of bottlenecks: the onset of saccade-related activity did not vary  
323 with TSD as predicted by the single-channel bottleneck hypothesis (see **Fig. 2**), and both  
324 saccade plans showed consistent activity modulations with TSD. A reduction in the rate of  
325 accumulation and an increase in the threshold activity level were seen for the second saccade  
326 plan. In contrast, only changes in the slope of the activity corresponding to the first saccade  
327 were observed, which may account for the more subtle changes in RT1.

328

### 329 **Inhibitory control underlying processing bottlenecks**

330 We tested whether mutually inhibitory accumulators encoding distinct saccade plans  
331 can mimic capacity sharing, wherein both the saccadic eye movements are executed with  
332 delays, especially for the second saccade. Modelling such a response required two important  
333 conditions: the first condition required that the inhibition be asymmetric, being greater for the  
334 first saccade plan than the second saccade plan, which manifest as greater capacity and faster  
335 information processing for the former compared to the latter. Such an asymmetry is a natural  
336 consequence of the temporal delay allowing for greater activity in the first saccade to inhibit  
337 the second saccade; the second condition required an inhibitory kernel that decreased with  
338 target step delay, such that inhibition from the first accumulator to be greater at shorter delays

339 despite being the level of activity in the accumulator being lesser compared to what it would  
340 be at larger target step delays. Such an inhibitory kernel is necessary to match the observed  
341 behavioral data of greater second saccade reaction times as well as the neural data which  
342 showed greater interference for the second saccade motor plans at the shorter TSDs.  
343 Interestingly, using a dynamical systems approach under the assumption of stationarity of  
344 noise across trials (Elsayed et al., 2016), this model of inhibitory control could be also shown  
345 to act as a “queuing” mechanism, in which non-orthogonal neural spaces can simultaneously  
346 allow parallel processing but yet temporarily slow the processing of the second saccade. We  
347 believe that the ability of such inhibition to reconfigure the neural space may reflect the  
348 nonlinear effects of inhibition on the pattern of activity representing accumulator activity that  
349 underlie the saccades.

350         The simplest and most parsimonious explanation for the location of such a bottleneck  
351 is at the level of FEF via bilateral mutual inhibition (Ray et al., 2009) of competing motor  
352 plans developing in the FEF. This type of inhibitory gating can be brought about by  
353 inhibitory interneurons within the FEF (Markram et al., 2004; Somogyi, 1977). Although  
354 such a form of inhibition is intuitive and can be readily implemented within the proposed  
355 frameworks described for decision-making circuits (Bogacz et al., 2006; Ratcliff and Smith,  
356 2004), implementing an inhibitory kernel that decreases with increasing TSD cannot be easily  
357 implemented in a straightforward manner by mutually inhibitory accumulators. Furthermore,  
358 using an identical task, our previous work has shown that the basal ganglia is causally  
359 involved in the conversion of parallel movement plans into sequential behavior (Bhutani et  
360 al., 2013). Inactivation of the basal ganglia in monkeys with muscimol or impairment of the  
361 basal ganglia in Parkinson’s disease patients resulted in a significantly greater extent of  
362 saccadic errors that develop due to unchecked parallel programming leading to a ‘collision’  
363 of saccade plans. The results of both these studies can be reconciled by the fact that FEF and  
364 basal ganglia share a closed connection through the cortico-BG-thalamo-cortical loop  
365 wherein the thalamus, a major relay center, receives projections from BG output nuclei, and  
366 in turn projects to multiple cortical regions, including the FEF, which are again routed to the  
367 input nuclei of basal ganglia (Alexander et al., 1986; Middleton and Strick, 2000; Parent and  
368 Hazrati, 1995a, b). Thus , the origin of the bottleneck could also be in the well-established  
369 inhibitory control circuitry of the basal ganglia (Hikosaka et al., 2000) and then re-routed to  
370 the FEF through the basal ganglia-thalamo-cortical loop (Goldman-Rakic and Porrino, 1985),  
371 which then manifests its various adjustments of movement-related neuronal activity.

372

### 373 **Neural representations of processing bottlenecks within FEF**

374 Our data show robust signatures of processing bottlenecks involving rate and  
375 threshold adjustments of FEF movement neurons contributing to the observed processing  
376 bottlenecks. Interestingly, similar adjustments of rate have been observed in FEF movement-  
377 related neurons when monkeys slow their reaction times to improve their accuracy (Heitz and  
378 Schall, 2012), consistent with movement-related activity reflecting a developing motor plan  
379 that can be adjusted by strategic requirements of the task. However, in contrast to  
380 speed/accuracy adjustments, we did find systematic increases in threshold for the second  
381 saccade with shorter TSDs that together with decreases in accumulation rate, contribute to the  
382 lengthening of reaction times for the second saccade. Interestingly, similar changes in growth  
383 rate for both the first and second saccade, particularly at shorter TSDs, were also observed in  
384 our model of mutually inhibiting accumulators but without any changes in threshold (**Fig 5**),  
385 raising the possibility that these changes may involve additional processes such as  
386 adjustments in the excitability of superior colliculus neurons from the basal ganglia (Lo and  
387 Wang, 2006; Wurtz and Hikosaka, 1986) that were not modelled here.

388 In contrast to the movement neurons, the activity of visual neurons displayed little  
389 evidence of active inhibitory control, suggesting that they are ‘pre-bottleneck’. This is not  
390 surprising since many studies have reported a separation between the visual and motor  
391 processing of FEF neurons with only motor processing affecting reaction time in perceptually  
392 simple tasks, thus it is plausible that the responses of visual neurons are not gated by  
393 inhibitory bottlenecks for our task. However, it can be speculated that in a more perceptually  
394 challenging task, manifestations of processing bottlenecks would show up in the activity of  
395 visual responses as well. Thereby, it can be concluded that movement neurons, which are  
396 thought to be functionally downstream of visual neurons (Woodman et al., 2008), are  
397 subjected to a greater degree of inhibitory control, possibly due to its direct role in saccade  
398 initiation. A similar result was observed in the countermanding (Hanes et al., 1998) and  
399 redirect tasks (Murthy et al., 2009), where movement-related neurons showed the strongest  
400 evidence of inhibitory control that reflected the monkeys’ abilities to withhold or change  
401 saccade plans. Thus, movement-related activity would fall under the ‘post-/peri- bottleneck’  
402 category while visually-related activity would be ‘pre-bottleneck’, at least for perceptually  
403 simple tasks.

404

405 **References**

- 406 Alexander, G.E., DeLong, M.R., and Strick, P.L. (1986). Parallel organization of functionally  
407 segregated circuits linking basal ganglia and cortex. *Annual review of neuroscience* 9, 357-  
408 381.
- 409
- 410 Arnell, K.M., and Duncan, J. (2002). Separate and shared sources of dual-task cost in  
411 stimulus identification and response selection. *Cognitive psychology* 44, 105-147.
- 412
- 413 Basu, D., and Murthy, A. (2020). Parallel programming of saccades in the macaque frontal  
414 eye field: are sequential motor plans coactivated? *Journal of neurophysiology* 123, 107-119.
- 415
- 416 Becker, W., and Jürgens, R. (1979). An analysis of the saccadic system by means of double  
417 step stimuli. *Vision research* 19, 967-983.
- 418
- 419 Bhutani, N., Ray, S., and Murthy, A. (2012). Is saccade averaging determined by visual  
420 processing or movement planning? *Journal of neurophysiology* 108, 3161-3171.
- 421
- 422 Bhutani, N., Sureshbabu, R., Farooqui, A.A., Behari, M., Goyal, V., and Murthy, A. (2013).  
423 Queuing of concurrent movement plans by basal ganglia. *Journal of Neuroscience* 33, 9985-  
424 9997.
- 425
- 426 Bogacz, R., Brown, E., Moehlis, J., Holmes, P., and Cohen, J.D. (2006). The physics of  
427 optimal decision making: a formal analysis of models of performance in two-alternative  
428 forced-choice tasks. *Psychological review* 113, 700.
- 429
- 430 Boucher, L., Palmeri, T.J., Logan, G.D., and Schall, J.D. (2007). Inhibitory control in mind  
431 and brain: an interactive race model of countermanding saccades. *Psychological review* 114,  
432 376.
- 433
- 434 Broadbent, D.E. (1971). *Decision and stress*.
- 435
- 436 Bruce, C.J., and Goldberg, M.E. (1985). Primate frontal eye fields. I. Single neurons  
437 discharging before saccades. *Journal of neurophysiology* 53, 603-635.
- 438
- 439 Churchland, M.M., Cunningham, J.P., Kaufman, M.T., Foster, J.D., Nuyujukian, P., Ryu, S.I.,  
440 and Shenoy, K.V. (2012). Neural population dynamics during reaching. *Nature* 487, 51-56.
- 441

442 Coëffé, C., and O'regan, J.K. (1987). Reducing the influence of non-target stimuli on  
443 saccade accuracy: Predictability and latency effects. *Vision research* 27, 227-240.  
444  
445 Ding, L., and Gold, J.I. (2012). Separate, causal roles of the caudate in saccadic choice and  
446 execution in a perceptual decision task. *Neuron* 75, 865-874.  
447  
448 Elsayed, G.F., Lara, A.H., Kaufman, M.T., Churchland, M.M., and Cunningham, J.P. (2016).  
449 Reorganization between preparatory and movement population responses in motor cortex.  
450 *Nature communications* 7, 1-15.  
451  
452 Findlay, J.M. (1982). Global visual processing for saccadic eye movements. *Vision research*  
453 22, 1033-1045.  
454  
455 Gold, J.I., and Shadlen, M.N. (2007). The neural basis of decision making. *Annual review of*  
456 *neuroscience* 30.  
457  
458 Goldman-Rakic, P.S., and Porrino, L.J. (1985). The primate mediodorsal (MD) nucleus and  
459 its projection to the frontal lobe. *Journal of Comparative Neurology* 242, 535-560.  
460  
461 Gopher, D., and Navon, D. (1980). How is performance limited: Testing the notion of central  
462 capacity. *Acta psychologica* 46, 161-180.  
463  
464 Hanes, D.P., Patterson, W.F., and Schall, J.D. (1998). Role of frontal eye fields in  
465 countermanding saccades: visual, movement, and fixation activity. *Journal of*  
466 *neurophysiology* 79, 817-834.  
467  
468 Hanes, D.P., and Schall, J.D. (1996). Neural control of voluntary movement initiation.  
469 *Science* 274, 427-430.  
470  
471 Heitz, R.P., and Schall, J.D. (2012). Neural mechanisms of speed-accuracy tradeoff. *Neuron*  
472 76, 616-628.  
473  
474 Hikosaka, O., Takikawa, Y., and Kawagoe, R. (2000). Role of the basal ganglia in the control  
475 of purposive saccadic eye movements. *Physiological reviews* 80, 953-978.  
476

477 Huerta, M.F., Krubitzer, L.A., and Kaas, J.H. (1986). Frontal eye field as defined by  
478 intracortical microstimulation in squirrel monkeys, owl monkeys, and macaque monkeys: I.  
479 Subcortical connections. *Journal of Comparative Neurology* 253, 415-439.  
480  
481 Jagadisan, U.K., and Gandhi, N.J. (2016). Disruption of fixation reveals latent sensorimotor  
482 processes in the superior colliculus. *Journal of Neuroscience* 36, 6129-6140.  
483  
484 Kahneman, D. (1973). *Attention and effort*, Vol 1063 (Citeseer).  
485  
486 Langer, T.P., and Kaneko, C.R. (1990). Brainstem afferents to the oculomotor omnipause  
487 neurons in monkey. *Journal of Comparative Neurology* 295, 413-427.  
488  
489 Lo, C.-C., and Wang, X.-J. (2006). Cortico–basal ganglia circuit mechanism for a decision  
490 threshold in reaction time tasks. *Nature neuroscience* 9, 956-963.  
491  
492 Markram, H., Toledo-Rodriguez, M., Wang, Y., Gupta, A., Silberberg, G., and Wu, C. (2004).  
493 Interneurons of the neocortical inhibitory system. *Nature reviews neuroscience* 5, 793-807.  
494  
495 Marois, R., and Ivanoff, J. (2005). Capacity limits of information processing in the brain.  
496 *Trends in cognitive sciences* 9, 296-305.  
497  
498 McLeod, P. (1977). A dual task response modality effect: Support for multiprocessor models  
499 of attention. *Quarterly Journal of Experimental Psychology* 29, 651-667.  
500  
501 McPeck, R.M., Han, J.H., and Keller, E.L. (2003). Competition between saccade goals in the  
502 superior colliculus produces saccade curvature. *Journal of neurophysiology* 89, 2577-2590.  
503  
504 McPeck, R.M., and Keller, E.L. (2002). Superior colliculus activity related to concurrent  
505 processing of saccade goals in a visual search task. *Journal of Neurophysiology* 87, 1805-  
506 1815.  
507  
508 McPeck, R.M., Skavenski, A.A., and Nakayama, K. (2000). Concurrent processing of  
509 saccades in visual search. *Vision research* 40, 2499-2516.  
510  
511 Middleton, F.A., and Strick, P.L. (2000). Basal ganglia and cerebellar loops: motor and  
512 cognitive circuits. *Brain research reviews* 31, 236-250.  
513



- 514 Minken, A., Van Opstal, A., and Van Gisbergen, J. (1993). Three-dimensional analysis of  
515 strongly curved saccades elicited by double-step stimuli. *Experimental Brain Research* 93,  
516 521-533.
- 517
- 518 Murthy, A., Ray, S., Shorter, S.M., Priddy, E.G., Schall, J.D., and Thompson, K.G. (2007).  
519 Frontal eye field contributions to rapid corrective saccades. *Journal of Neurophysiology* 97,  
520 1457-1469.
- 521
- 522 Murthy, A., Ray, S., Shorter, S.M., Schall, J.D., and Thompson, K.G. (2009). Neural control  
523 of visual search by frontal eye field: effects of unexpected target displacement on visual  
524 selection and saccade preparation. *Journal of Neurophysiology* 101, 2485-2506.
- 525
- 526 Navon, D., and Miller, J. (2002). Queuing or sharing? A critical evaluation of the single-  
527 bottleneck notion. *Cognitive psychology* 44, 193-251.
- 528
- 529 Nosofsky, R.M., and Palmeri, T.J. (1997). Comparing exemplar-retrieval and decision-bound  
530 models of speeded perceptual classification. *Perception & Psychophysics* 59, 1027-1048.
- 531
- 532 Parent, A., and Hazrati, L.-N. (1995a). Functional anatomy of the basal ganglia. I. The  
533 cortico-basal ganglia-thalamo-cortical loop. *Brain research reviews* 20, 91-127.
- 534
- 535 Parent, A., and Hazrati, L.-N. (1995b). Functional anatomy of the basal ganglia. II. The place  
536 of subthalamic nucleus and external pallidum in basal ganglia circuitry. *Brain research*  
537 *reviews* 20, 128-154.
- 538
- 539 Pashler, H. (1994). Dual-task interference in simple tasks: data and theory. *Psychological*  
540 *bulletin* 116, 220.
- 541
- 542 Phillips, A.N., and Segraves, M.A. (2010). Predictive activity in macaque frontal eye field  
543 neurons during natural scene searching. *Journal of neurophysiology* 103, 1238-1252.
- 544
- 545 Port, N.L., and Wurtz, R.H. (2003). Sequential activity of simultaneously recorded neurons in  
546 the superior colliculus during curved saccades. *Journal of neurophysiology* 90, 1887-1903.
- 547
- 548 Purcell, B.A., Heitz, R.P., Cohen, J.Y., and Schall, J.D. (2012). Response variability of frontal  
549 eye field neurons modulates with sensory input and saccade preparation but not visual  
550 search salience. *Journal of neurophysiology* 108, 2737-2750.

551

552 Purcell, B.A., Heitz, R.P., Cohen, J.Y., Schall, J.D., Logan, G.D., and Palmeri, T.J. (2010).  
553 Neurally constrained modeling of perceptual decision making. *Psychological review* 117,  
554 1113.

555

556 Ramakrishnan, A., and Murthy, A. (2013). Brain mechanisms controlling decision making  
557 and motor planning. In *Progress in brain research* (Elsevier), pp. 321-345.

558

559 Ratcliff, R., Hasegawa, Y.T., Hasegawa, R.P., Smith, P.L., and Segraves, M.A. (2007). Dual  
560 diffusion model for single-cell recording data from the superior colliculus in a brightness-  
561 discrimination task. *Journal of neurophysiology* 97, 1756-1774.

562

563 Ratcliff, R., and Rouder, J.N. (1998). Modeling response times for two-choice decisions.  
564 *Psychological science* 9, 347-356.

565

566 Ratcliff, R., and Smith, P.L. (2004). A comparison of sequential sampling models for two-  
567 choice reaction time. *Psychological review* 111, 333.

568

569 Ray, S., Bhutani, N., and Murthy, A. (2012). Mutual inhibition and capacity sharing during  
570 parallel preparation of serial eye movements. *Journal of vision* 12, 17-17.

571

572 Ray, S., Pouget, P., and Schall, J.D. (2009). Functional distinction between visuomovement  
573 and movement neurons in macaque frontal eye field during saccade countermanding.  
574 *Journal of Neurophysiology* 102, 3091-3100.

575

576 Ray, S., Schall, J.D., and Murthy, A. (2004). Programming of double-step saccade  
577 sequences: modulation by cognitive control. *Vision research* 44, 2707-2718.

578

579 Ruthruff, E., Pashler, H.E., and Klaassen, A. (2001). Processing bottlenecks in dual-task  
580 performance: Structural limitation or strategic postponement? *Psychonomic bulletin & review*  
581 8, 73-80.

582

583 Sato, T., Murthy, A., Thompson, K.G., and Schall, J.D. (2001). Search efficiency but not  
584 response interference affects visual selection in frontal eye field. *Neuron* 30, 583-591.

585

586 Segraves, M.A. (1992). Activity of monkey frontal eye field neurons projecting to oculomotor  
587 regions of the pons. *Journal of Neurophysiology* 68, 1967-1985.

588

589 Segraves, M.A., and Goldberg, M.E. (1987). Functional properties of corticotectal neurons in  
590 the monkey's frontal eye field. *Journal of Neurophysiology* *58*, 1387-1419.

591

592 Sendhilnathan, N., Basu, D., Goldberg, M.E., Schall, J.D., and Murthy, A. (2021). Neural  
593 correlates of goal-directed and non-goal-directed movements. *Proceedings of the National  
594 Academy of Sciences* *118*.

595

596 Sendhilnathan, N., Basu, D., and Murthy, A. (2017). Simultaneous analysis of the LFP and  
597 spiking activity reveals essential components of a visuomotor transformation in the frontal  
598 eye field. *Proceedings of the National Academy of Sciences* *114*, 6370-6375.

599

600 Sendhilnathan, N., Basu, D., and Murthy, A. (2020). Assessing within-trial and across-trial  
601 neural variability in macaque frontal eye fields and their relation to behaviour. *European  
602 Journal of Neuroscience*.

603

604 Sharika, K., Ramakrishnan, A., and Murthy, A. (2008). Control of predictive error correction  
605 during a saccadic double-step task. *Journal of neurophysiology* *100*, 2757-2770.

606

607 Shen, K., and Paré, M. (2014). Predictive saccade target selection in superior colliculus  
608 during visual search. *Journal of Neuroscience* *34*, 5640-5648.

609

610 Sigman, M., and Dehaene, S. (2005). Parsing a cognitive task: a characterization of the  
611 mind's bottleneck. *PLoS biology* *3*, e37.

612

613 Smith, P.L., and Van Zandt, T. (2000). Time-dependent Poisson counter models of response  
614 latency in simple judgment. *British Journal of Mathematical and Statistical Psychology* *53*,  
615 293-315.

616

617 Sommer, M.A., and Wurtz, R.H. (2000). Composition and topographic organization of signals  
618 sent from the frontal eye field to the superior colliculus. *Journal of Neurophysiology* *83*,  
619 1979-2001.

620

621 Somogyi, P. (1977). A specific 'axo-axonal' interneuron in the visual cortex of the rat. *Brain  
622 Res* *136*, 345-350.

623

- 624 Thompson, K.G., Bichot, N.P., and Schall, J.D. (1997). Dissociation of visual discrimination  
625 from saccade programming in macaque frontal eye field. *Journal of neurophysiology* 77,  
626 1046-1050.
- 627
- 628 Thompson, K.G., Hanes, D.P., Bichot, N.P., and Schall, J.D. (1996). Perceptual and motor  
629 processing stages identified in the activity of macaque frontal eye field neurons during visual  
630 search. *Journal of neurophysiology* 76, 4040-4055.
- 631
- 632 Tian, J., Schlag, J., and Schlag-Rey, M. (2000). Testing quasi-visual neurons in the  
633 monkey's frontal eye field with the triple-step paradigm. *Experimental brain research* 130,  
634 433-440.
- 635
- 636 Tombu, M., and Jolicoeur, P. (2003). A central capacity sharing model of dual-task  
637 performance. *Journal of Experimental Psychology: Human Perception and Performance* 29,  
638 3.
- 639
- 640 Usher, M., and McClelland, J.L. (2001). The time course of perceptual choice: the leaky,  
641 competing accumulator model. *Psychological review* 108, 550.
- 642
- 643 Viviani, P., and Swensson, R.G. (1982). Saccadic eye movements to peripherally  
644 discriminated visual targets. *Journal of Experimental Psychology: Human Perception and*  
645 *Performance* 8, 113.
- 646
- 647 Welford, A. (1967). Single-channel operation in the brain. *Acta psychologica* 27, 5-22.
- 648
- 649 Welford, A.T. (1952). The psychological refractory period and the timing of high-speed  
650 performance-a review and a theory. *British Journal of Psychology* 43, 2.
- 651
- 652 Westheimer, G. (1954). Eye movement responses to a horizontally moving visual stimulus.  
653 *AMA archives of ophthalmology* 52, 932-941.
- 654
- 655 Wheelless, L.L., Boynton, R.M., and Cohen, G.H. (1966). Eye-movement responses to step  
656 and pulse-step stimuli. *JOSA* 56, 956-960.
- 657
- 658 Woodman, G.F., Kang, M.-S., Thompson, K., and Schall, J.D. (2008). The effect of visual  
659 search efficiency on response preparation: neurophysiological evidence for discrete flow.  
660 *Psychological science* 19, 128-136.

661

662 Wu, E.X., Gilani, S.O., van Boxtel, J.J., Amihai, I., Chua, F.K., and Yen, S.-C. (2013).

663 Parallel programming of saccades during natural scene viewing: Evidence from eye

664 movement positions. *Journal of vision* 13, 17-17.

665

666 Wurtz, R.H., and Hikosaka, O. (1986). Role of the basal ganglia in the initiation of saccadic

667 eye movements. In *Progress in brain research* (Elsevier), pp. 175-190.

668

669 Zambarbieri, D., Schmid, R., and Ventre, J. (1987). Saccadic eye movements to predictable

670 visual and auditory targets. In *Eye Movements from Physiology to Cognition* (Elsevier), pp.

671 131-140.

672

673 Zylberberg, A., Ouellette, B., Sigman, M., and Roelfsema, P.R. (2012). Decision making

674 during the psychological refractory period. *Current biology* 22, 1795-1799.

675

676

677 **METHODS:**

678

679 **KEY RESOURCES TABLE**

| REAGENT OR RESOURCE                           | SOURCE                 | IDENTIFIER                                                                                                              |
|-----------------------------------------------|------------------------|-------------------------------------------------------------------------------------------------------------------------|
| <b>Experimental models: Organisms/Strains</b> |                        |                                                                                                                         |
| Rhesus macaque ( <i>Macaca mulatta</i> )      |                        | N/A                                                                                                                     |
| Bonnet macaque ( <i>Macaca radiata</i> )      |                        | N/A                                                                                                                     |
| <b>Software and Algorithms</b>                |                        |                                                                                                                         |
| MATLAB                                        | Mathworks              | <a href="https://www.mathworks.com/products/matlab.html">https://www.mathworks.com/products/matlab.html</a>             |
| Blackrock                                     | Blackrock Microsystems | <a href="https://www.blackrockmicro.com/">https://www.blackrockmicro.com/</a>                                           |
| ISCAN eye tracking system                     | ISCAN                  | <a href="http://iscaninc.com/">http://iscaninc.com/</a>                                                                 |
|                                               |                        |                                                                                                                         |
| <b>Others</b>                                 |                        |                                                                                                                         |
| Tungsten microelectrode                       | FHC                    | <a href="https://www.fh-co.com/product/metal-microelectrodes/">https://www.fh-co.com/product/metal-microelectrodes/</a> |

680

681

682 **CONTACT FOR REAGENT AND RESOURCE SHARING**

683 Further information and requests for resources and reagents should be directed to and  
684 will be fulfilled by the Lead Contact, Debaleena Basu ([basu.debaleena@gmail.com](mailto:basu.debaleena@gmail.com)).

685

686

687 **EXPERIMENTAL MODEL AND SUBJECT DETAILS**

688 The detailed methods pertaining to this dataset has been published in a previous study  
689 (Basu & Murthy 2020; Sendhilnathan et al., 2021). A brief overview is given below.

690

### 691 *Experimental Animals*

692 Single-unit recordings were done from two adult monkeys (J, male *Macaca radiata*,  
693 and G, female *Macaca mulatta*). The animals were cared for in accordance with the animal  
694 ethics guidelines of the Committee for the Purpose of Control and Supervision of  
695 Experiments on Animals (CPCSEA), Government of India, and the Institutional Animal  
696 Ethics Committee (IAEC) of the Indian Institute of Science (IISc.).

697

### 698 *Surgical Procedures*

699 Each monkey underwent two surgeries: first, to implant a titanium headpost for the  
700 purpose of head-fixation during experiments, and second to make an MRI-guided craniotomy  
701 over the FEF and implant a recording chamber (Crist instruments, USA). Training or  
702 recording sessions were conducted only after the monkeys completed surgical recovery.

703

## 704 **METHOD DETAILS**

### 705 *Behavioral tasks:*

706 Monkeys were trained on two oculomotor tasks: the memory-guided (MG) saccade  
707 task and the FOLLOW saccade task. Trials in the MG task began with a red fixation point  
708 ( $0.6^\circ \times 0.6^\circ$ ) which was presented in the center of a screen. After a variable fixation period  
709 (~300 ms), a gray target stimulus ( $1^\circ \times 1^\circ$ ) was presented peripherally. Post-appearance, the  
710 target disappeared after 100 ms; however, the monkeys were required to fixate for a delay  
711 period of around 1000 ms. The fixation spot was extinguished after the delay period,  
712 following which the monkeys had to make a saccade to the remembered target location.  
713 Correct trials were reinforced with juice rewards. The delay period served to aid the  
714 classification of FEF neurons by isolating the stimulus-related (visual) and saccade-related  
715 (motor) epochs.

716

717 The FOLLOW task (**Fig S1**) is a modified version of the double-step task (Becker and  
718 Jürgens, 1979; Westheimer, 1954; Wheelless et al., 1966), where single saccade no-step trials  
719 (30%) were randomly interleaved with sequential saccade step trials (70%). Trials started  
720 with fixation, following which a green saccade target ( $1^\circ \times 1^\circ$ ) was presented in one of the

721 six possible peripheral locations (eccentricity 12°). The fixation spot was removed at target  
722 onset. In no-step trials, the monkeys had to execute a single, correct saccade to the target. In  
723 step trials a red second target (1° × 1°) appeared after target 1, signaling the monkey to make  
724 ordered sequential saccades. Step trials comprised two targets, the first one being same as in  
725 the no-step trials. After a variable time delay (target step delay (TSD): 17 ms, 83 ms, or 150  
726 ms), a red target was displayed. Monkeys had to make an additional second saccade from  
727 target 1 to target 2 to get rewarded in step trials.

728

729 Response field (RF) identification was done using the MG task. The RF center, and  
730 the two flanking positions were set as 'RFin' positions and the three diametrically opposite  
731 positions were considered 'RFout' positions. No-step targets and the first target of step trials  
732 could appear at any one of the six RFin and RFout locations. The second target in step trials  
733 was presented in any one of three positions diametrically opposite to the location of the first  
734 target. Based on this scheme, RFin trials refer to trials in which the second target or target 2  
735 was presented in the RF while target 1 was outside RF. RFout trials are those in which target  
736 1 was inside RF and target 2 was outside. Neural activity in RFin trials would mainly encode  
737 the second target or second saccade, while RFout trials would represent the first target or the  
738 saccade.

739

#### 740 ***Recording setup and procedures:***

741 The tasks were designed and displayed using TEMPO and VIDEOSYNC software  
742 (Reflective computing, St. Louis, MO, USA). A Sony Bravia LCD monitor (42 inches, 60 Hz  
743 refresh rate; 640 × 480 resolution) was used to show the task stimuli to the monkeys. An  
744 infrared eye tracker (ISCAN, Woburn, MA USA) was used to track the pupils throughout the  
745 recording session.

746 Neural recordings were undertaken using tungsten microelectrodes (FHC, Bowdoin,  
747 ME, USA, impedance 2 - 4 MΩ). A Cerebus data acquisition system (Blackrock  
748 Microsystems, Salt Lake City, UT, USA), which was synchronized to the TEMPO software,  
749 was used to sample and store neuronal data at 30,000 Hz. In each recording session, the MG  
750 task was used to identify and classify FEF neurons. After RF and cell type was identified, the  
751 FOLLOW task was started.

752

#### 753 **QUANTIFICATION AND STATISTICAL ANALYSIS**



754 ***Data Analysis:***

755 The collected neural data was sorted offline using the in-built spike-sorting tool of  
756 Cerebus system (Blackrock Microsystems). Saccades were detected from eye position data  
757 using a 30°/s velocity threshold. Analysis of the data was done using MATLAB (MathWorks,  
758 Natick, MA, USA). This study used only trials with correct responses, with at least eight  
759 trials per condition as the inclusion criteria. The final dataset for this study comprised 84 FEF  
760 neurons. A filter mimicking an excitatory post-synaptic potential (EPSP) was used to  
761 convolve spike data (Murthy et al., 2007).

762 The classification of FEF neurons was done using the MG task. The delay period  
763 separated the visual epoch (90-180 ms after target onset) from the movement epoch (80 ms  
764 window preceding saccade onset). Visual neurons were identified if the activity was  
765 increased in the visual epoch compared to baseline (300-100 ms preceding target onset),  
766 movement neuron displayed higher activity in the movement epoch, and visuomovement  
767 neurons showed increased activity in both the epochs. A visuo-motor index (VMI) was used  
768 to validate the cell classification (Murthy et al., 2007).

$$VMI = \frac{VA - MA}{VA + MA}$$

769 where  $VA$  = mean firing rate above baseline in the visual epoch

$MA$  = mean firing rate above baseline in the movement epoch

770

771 With the range being from +1 to -1, visual neurons had positive VMIs, while  
772 movement neurons had negative VMIs. Visuomovement neurons yielded intermediate VMIs.  
773 Activity in the single saccade trials of the FOLLOW task was also taken in account for proper  
774 cell classification, as changing task contexts have been shown to influence neuronal activity  
775 profiles (Jagadisan and Gandhi, 2016).

776

777 ***Accumulator parameters:***

778 Taking cue from accumulator models and previous studies (Woodman et al., 2008),  
779 four main parameters were calculated: (1) Baseline firing rate; (2) Onset of firing rate  
780 increase; (3) Threshold activity required for saccade initiation; (4) Rate of growth of activity  
781 from onset to threshold. These measures of accumulator dynamics were calculated separately  
782 for FOLLOW step trials in which the first saccade went into the RF (RFout) and those in  
783 which the second saccade was towards the RF (RFin). Since correct FOLLOW step trials  
784 always had a sequence of two saccades stepping from an RF-in position to an RF-out position

785 or vice versa, the activity in the RFin trials was a mix of RFout and RFin activities. To  
786 specifically analyze activity that contributed only to the second saccades made into the RF,  
787 the mean RF-out activity of no-step trials was used as a reference and subtracted from the  
788 mean activity in RFin step-trials. For single neurons, the parameter calculations were made  
789 from non-normalized, differential activity for RFin trials.

790 For FOLLOW no-step trials, trials in which the saccade was into the response field  
791 were used for accumulator parameter calculation. Trials in each session were grouped into  
792 fast, medium, or slow reaction time trials based on the average reaction time of that session,  
793 i.e. trials with reaction time less than 30 ms below mean reaction time were considered as fast  
794 trials, those with reaction time more than 30 ms above mean reaction time were slow trials,  
795 and trials around the mean reaction time ( $\pm 10$  ms) were medium reaction time trials.  
796 Accumulator parameters were then calculated for the three-reaction time groups.

797 Baseline activity was measured as the average of the differential activity in the RFin  
798 condition in the 100 ms before the appearance of the first FOLLOW target. Onset was  
799 defined as the time point when FEF activity first exceeded 2 SDs above baseline, provided  
800 that the differential activity ultimately reached 4 SDs and was maintained above 2 SDs for at  
801 least 50 ms for the second saccade plan and 20 ms for the first saccade plan. Threshold  
802 activation was the average firing rate in the RF-in condition in the interval from 10 to 20 ms  
803 before saccade initiation (Hanes and Schall, 1996). Rate of activity growth was measured by  
804 subtracting the threshold-activity level from the onset-activity level and dividing by the time  
805 interval between onset and threshold. This measure was robust against fluctuations in the  
806 rise-profile. To better understand non-linear rise profiles, the rate was also measured by  
807 piecewise regression fits using a sliding window of width 40 ms (for RFin trials) from onset  
808 to threshold and calculating the slopes and intercepts at each point. For population analyses,  
809 difference SDFs of each session were normalized to the peak average activity in the TSD =  
810 17 ms group and for each saccade plan i.e. activity related to second saccade plan was  
811 normalized with respect to TSD 17 activity for second saccades going into the RF and vice  
812 versa for the first saccade plan. In the case of no-step trials, the SDFs were normalized to the  
813 peak activity of the fast trials in each session.

814

### 815 *Principal Components Analysis (PCA):*

816 For analyses based on dimensionality reduction, we performed two steps of data  
817 preprocessing before further analyses. First, we ‘soft normalized’ the neural responses ( $r$ ) for  
818 each neuron,  $i$ , by dividing the neural activity for each neuron ( $r_i$ ) by its range ( $|r_i| =$

819  $r_i/(range(r_i))$  (Churchland et al., 2012). Soft normalization preserves the structure of  
820 inter-neuronal variation while normalizing the population response so that neurons with  
821 strong responses could be reduced to approximately unity range, but neurons with weak  
822 responses could be reduced to less than unity range. Second, we mean-centered the responses  
823 of each neuron by subtracting the mean activity of a given neuron across all conditions ( $\bar{r}_i$ )  
824 from the neural response ( $|r_i| - \bar{r}_i$ ).

825 To identify the signals that best represent the population activity of neurons, we  
826 performed principal component analysis (PCA), a common unsupervised learning algorithm,  
827 on the data. To do this, we constructed two matrices  $P_1$  and  $P_2$  of size  $t \times n$  where  $t$  is the  
828 time and  $n$  is the number of neurons with population response for the first and the second  
829 saccade plans, respectively. We applied PCA to  $P_1$  and  $P_2$  yielding  $W_1$  and  $W_2$  respectively,  
830 which are  $n \times k$  matrix each, of principal components.

831 We used a metric to index the degree to which the population response occupied  
832 different neural dimensions on trials with different TSDs. To compute this ‘subspace overlap’  
833 between the first and the second saccade plans for each TSD, we first defined the variance  
834 captured as  $V(P, W) = 1 - \frac{\|P - PWW^T\|}{\|P\|}$ , where the operator  $\|X\|$  means the Frobenius norm of  
835 the matrix  $X$ . Then, the subspace overlap was given by:  $\frac{V(P_2W_1)}{V(P_2W_2)}$ .

836 Subspace overlap should be equal to one if the population responses occupied the  
837 same dimensions (i.e., are spanned by the same PCs) on both the saccade plans. And the  
838 subspace overlap should be equal to zero if the population responses occupied mutually  
839 orthogonal dimensions on both the saccade plans.

840

#### 841 *Neural Simulations:*

842 We simulated 40 motor neurons with 900 trials (with three types of TSD trials) using  
843 a firing rate model (**Fig S5A**) to approximately match the statistical power of our  
844 experimental dataset. We defined the spatial properties of each neuron (tuning curve) through  
845 a cosine function centered on one of the 8 positions which was randomly chosen and called it  
846 the neuron’s RF:

$$tuning(\theta) = r \cos(w\theta + \phi)$$

847

848 where  $r$  is the peak firing rate,  $w$  defines the width of the tuning curve,  $\theta$  is a set of 8 target  
849 positions and  $\phi$  is the displacement (**Fig S5B**). We then defined the temporal properties of  
850 the neurons (**Fig S5C**) using a skewed Gaussian distribution response kernel:

851

$$\begin{aligned} \text{kernel}(x) &= 2 \frac{1}{\sqrt{2\pi}} e^{-\frac{(x-m)^2}{2c}} \int_{-\infty}^{\alpha x} \frac{1}{\sqrt{2\pi}} e^{-\frac{t^2}{2c}} dt \\ &= \frac{1}{\sqrt{2\pi}} e^{-\frac{x^2}{2c}} \left[ 1 + \text{erf}\left(\frac{\alpha x}{\sqrt{2}}\right) \right] \end{aligned}$$

852

853

854 where  $c = 8000$  controls the full width at half maximum of the distribution,  $\text{erf}(x)$  is the  
855 error function and  $\alpha$  is the shape parameter that controls the shape of the distribution. To  
856 simulate a noisy accumulator (**Fig S5H**), we sampled  $m \sim \mathcal{N}(0, 40)$  and  $\alpha \sim -$   
857  $|\mathcal{N}(0, 0.01)|$ . Note that similar results can be obtained using a response kernel resembling a  
858 Poisson post-synaptic potential function:

859

$$\text{kernel}(x) = \left[ 1 - e^{-\frac{x}{\tau_g}} \right] \times \left[ e^{-\frac{x}{\tau_d}} \right]$$

860

861 where  $\tau_g$  controls the rate of increase and  $\tau_d$  controls the rate of decay.

862

863 We further injected a small noise to the system by convolving the response kernel with  
864 Gaussian noise of  $\mu = 0$  and  $\sigma^2 = 1$ . For each neuron, we multiplied the tuning curve and  
865 the convolved kernel to get the spatiotemporal firing rate for that neuron (**Fig S5D**). Saccade  
866 onsets were taken as the time when the normalized activity reached a fixed threshold of 1  
867 unit.

868

869 For the simulated data with asymmetric bilateral inhibition, we followed the above  
870 steps (for both plans 1 and 2) until the activity for plan 1 reached  $y\%$  of its peak response.  
871 This 'y' is given by an inhibition function (**Fig S5G**) which was constructed by dividing the  
872 neural response by the response in no-step trials. To simulate the inhibitory effect of plan 1  
873 on plan 2, we temporally shifted the response for plan 2, to until after the time of first saccade  
874 onset ( $t_{s1}$ ), after plan 1 reached  $y\%$  of its peak response and then interpolated the data in  
875 between using a cubic spline function.

876

$$r_2(t) = \begin{cases} r_2(t), & \text{if } t < T \\ r_2(t + (t_{s1} - T)), & \text{if } t \geq t_{s1} \end{cases}$$

877

878 where  $T = \text{arg}(y \times \max(r_1(t)))$

879

880 To simulate the effect of plan 2 on plan 1, we first normalized plan 2's response from  
881 0 to 1, then multiplied it by the same inhibition factor,  $y$  and then subtracted it from plan 1's  
882 response.

$$r_1(t) = r_1(t) - y \left( \frac{r_2(t) - \min(r_2(t))}{\max(r_2(t)) - \min(r_2(t))} \right)$$

883

884 Therefore, the nature of inhibition was asymmetric and, in this way, plans 1 and 2  
885 have the highest bilateral inhibition effect on each other for the shortest TSD and the least  
886 effect for the longest TSD. We estimated all the above hyper-parameters such that the  
887 simulated data closely resembled the experimental data.

888 For the simulated data with unilateral inhibition, we followed the same steps as above  
889 with the exception of the last step. That is, we modeled the effect of plan 1 on plan 2 by  
890 temporally shifting the plan 2 as described above but we did not account for the effect of plan  
891 2 on plan 1.

892 After simulating the data, we followed the same data pre-processing step before  
893 dimensionality reduction similar to the experimental data.

894

#### 895 ***Statistical testing:***

896 A two-sided Wilcoxon signed-rank test to analyze a single sample set of data. For  
897 group comparisons, the non-parametric Kruskal-Wallis test was used. Trials were considered  
898 to be independent observations as the TSDs on each trial was chosen randomly. All the  
899 results are presented as mean ( $\pm$  standard error of mean, SEM) and all tests are performed at a  
900 significance level of  $\alpha = 0.05$  unless otherwise mentioned.

901

#### 902 **Data and code availability:**

903 All data is available in the main text or the supplementary materials. Raw data and codes are  
904 available upon reasonable request.

905

906 **Acknowledgments:**

907 We thank S. Sengupta for helping with behavioral training and Dr. A. Gopal P.A. for helping  
908 with data collection.

909

910 **Funding:**

911 This work was supported by a D.B.T.-I.I.Sc (Department of Biotechnology, Government of  
912 India – Indian Institute of Science) partnership grant given to A.M. D.B was supported by a  
913 graduate fellowship from the Ministry of Human Resource Development (MHRD),  
914 Government of India, through the Indian Institute of Science.

915

916 **Author Contributions:** D.B. Performed research, Analyzed data, Wrote the paper. N.S.  
917 Analyzed data, Wrote the paper. A.M. Designed research, Wrote the paper.

918

919 **Competing interests:** Authors declare no competing interests.

920

921 **Disclosure:** The authors declare no competing financial interests

922

923

924

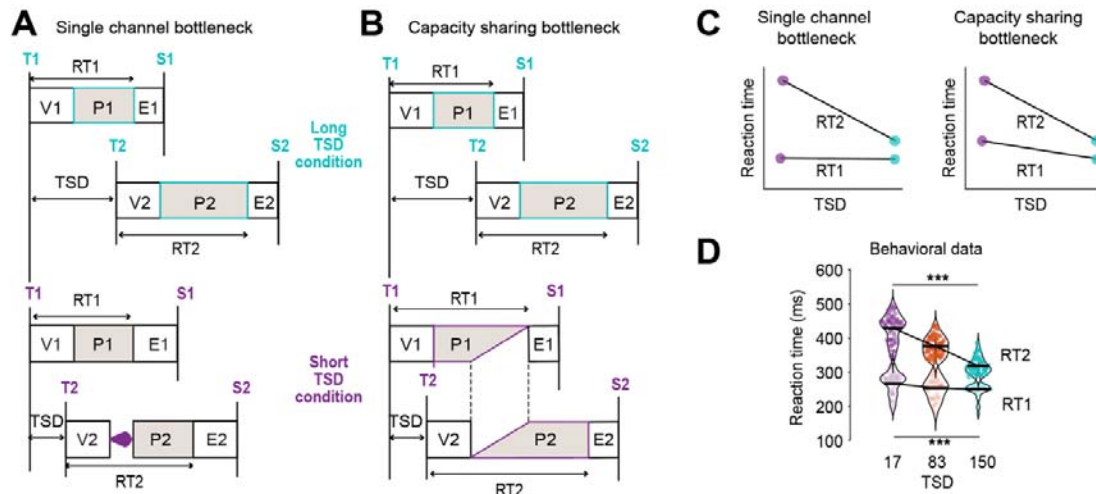

925  
926

**Figure 1. Behavioral predictions for processing bottlenecks during the planning of sequential saccades**

927  
928  
929

930 **A.** Single-channel bottleneck framework. Each task is made up of three stages. The visual stage (V) can be  
931 carried on in parallel with stages of another task, but the central planning stage, P, can only proceed singly. In a  
932 two-saccade sequence, the stages of the first saccade plan proceed to completion unabated leading to its  
933 execution (E). For the second plan however, if the second target closely follows the first (low TSD condition),  
934 the central planning stage, P2, is postponed till P1 is complete. Such a postponement does not occur in the long  
935 TSD condition, where the two saccade plans are well-separated, thereby leading to an increase of RT2 from long  
936 to short TSD.

937

938 **B.** Capacity-sharing bottleneck framework. In this framework, the P stages of multiple plans can proceed in  
939 parallel and access the brain's limited processing capacity simultaneously. In the low TSD condition, P1 and P2  
940 concurrently 'share' the capacity, resulting in slower progress of the saccade plans. This leads to lengthening of  
941 both RT1 and RT2 in the low TSD condition, the effect on RT2 being greater as the second saccade plan gets a  
942 smaller share of the central capacity.

943

944 **C.** Predictions of reaction time vs TSD for single-channel bottleneck framework (left) and capacity-sharing  
945 bottleneck framework (right). RT2 increases with decrease in TSD for both frameworks, whereas RT1 increase  
946 is predicted only by the capacity-sharing model.

947

948 **D.** Behavioral data for reaction time vs TSD. Data shows trials in which the first (for RT1) or second (for RT2)  
949 saccade was into the response field. Both reaction times increased significantly with decrease in TSD.

950

951

952

953

954

955

956

957

958

959

960

961  
962  
963

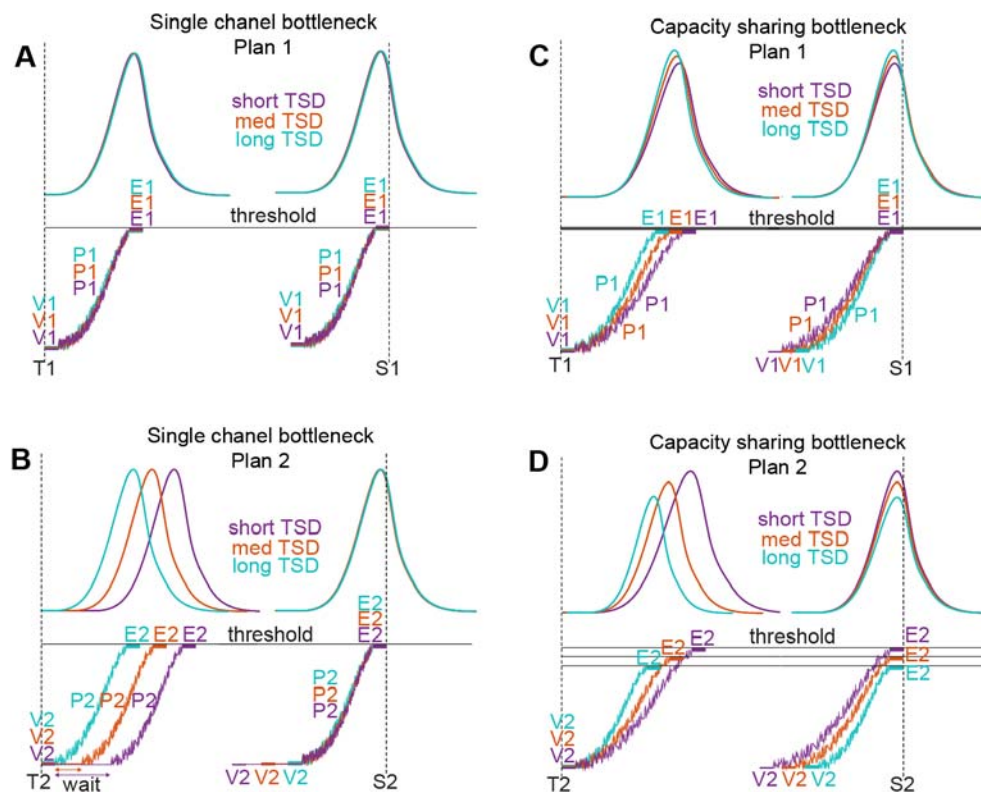

964  
965

**Figure 2. Neural activity predictions for processing bottlenecks during the planning of sequential saccades**

966  
967  
968

969 **A.** Hypothesized neural activity for saccade plan 1 in the single-channel bottleneck framework: Bottom: After  
970 the first visual target is presented (vertical broken line; T1), there is an initial visual processing stage (V1) which  
971 is often of constant duration for all plans. The planning stage (P1) for the first saccade is represented as a noisy  
972 integrator, accumulating activity till the motor threshold (horizontal solid line) is reached and the saccade is  
973 executed (E1). Top panel: The corresponding neural activity is shown as the ramping up of FEF movement  
974 neuron activity till saccade onset (S1). The activities corresponding to three different TSDs are shown in three  
975 different colors.  
976

977 **B.** Hypothesized neural activity for saccade plan 2 in the single-channel bottleneck framework. The onset of the  
978 accumulation process and the ramping up of the neural activity will shift later with decrease in TSD to account  
979 for RT2 elongation (same format as A; T2: onset of second target; V2: visual processing stage for target 2, P2:  
980 planning stage for saccade 2; E2: execution stage for plan 2; S2: onset of second saccade).  
981

982 **C.** Hypothesized neural activity for saccade plan 1 in the capacity-sharing bottleneck framework. The onsets of  
983 the integrators and the movement neuron activity do not change with TSD on account of parallel programming  
984 of the two saccade plans. Increase in saccade latencies at shorter TSDs maybe brought about by a decrease in  
985 the growth rate from long to short TSD. Same format as A.  
986

987 **D.** Hypothesized neural activity for saccade plan 2 in the capacity-sharing bottleneck framework. Same as C,  
988 with the addition of threshold modulation and a greater degree of rate adjustment with TSD to constitute the  
989 larger increase in RT2 from long to short TSD. Same format as A.



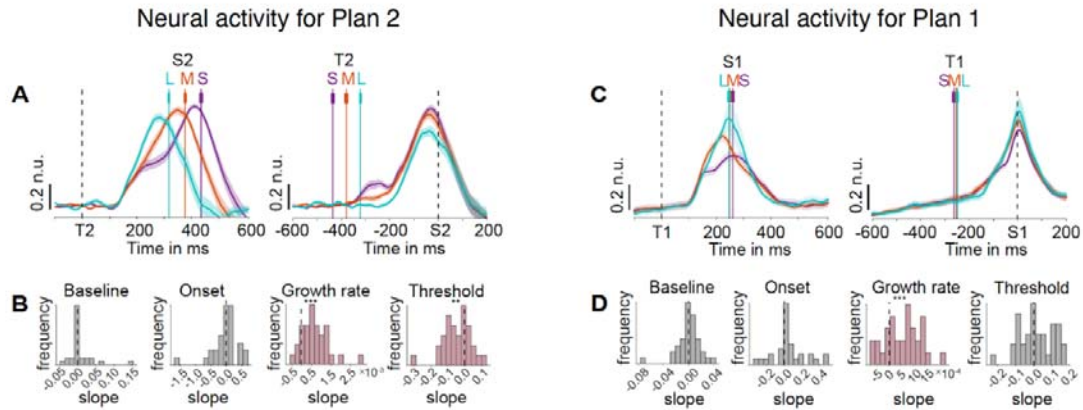

990  
991

**Figure 3. Activity for FEF movement neurons during sequential saccades**

992 **A. Top:** Population activity of FEF movement neurons when the second saccade went into the response field,  
993 aligned on second target onset (T2). Mean saccade onset times (S2) for the short, medium, and long TSD  
994 conditions are shown as vertical, colored lines with s.e.m error bars. Right: same as left but activity aligned to  
995 the second saccade onset. Shading indicates mean  $\pm$  SEM.  
996

997 **B.** Population histogram of slopes of each measure of accumulator dynamics (baseline, onset, growth rate and  
998 threshold) as a function of TSD for FEF movement neurons. Asterisks denote cases where the distribution of  
999 movement neuron slopes was significantly different from zero (Wilcoxon signed-rank test, \*\*\*  $p < .001$ , \*\*  $p <$   
1000  $.01$ ).  
1001

1002 **C.** Same as **A** but for saccade 1  
1003

1004 **D.** Same as **B** but for saccade 1  
1005  
1006  
1007  
1008  
1009  
1010  
1011  
1012  
1013  
1014  
1015  
1016  
1017  
1018  
1019  
1020  
1021  
1022  
1023  
1024

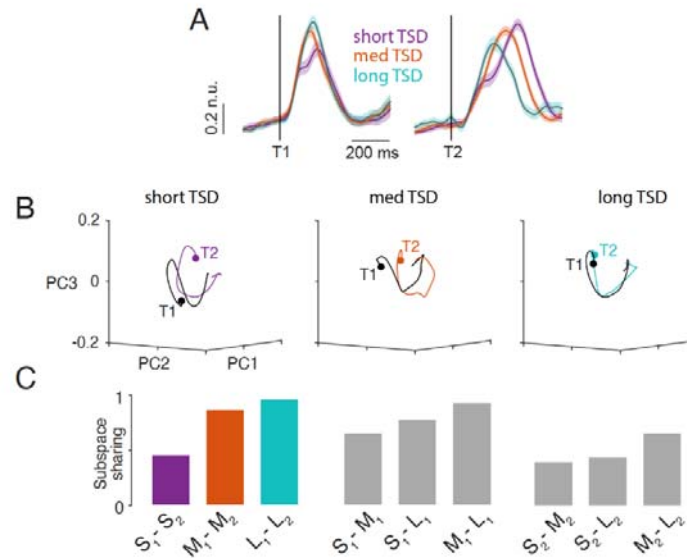

1025  
1026

1027 **Figure 4: Extent of subspace sharing explains processing bottlenecks during the**  
1028 **planning of sequential saccades**

1029

1030 **A.** Normalized mean population neural responses aligned to target 1 (T1) and target 2 (T2) for short, medium  
1031 and long TSD trials (n.u. = normalized unit); same as **Fig 3A** and **3C**.

1032

1033 **B.** Cumulative percent variance explained by the first 10 PCs for target (T1) (black) and target 2 (T2) (color)  
1034 related responses for short (left), medium (center) and long (right) TSD trials.

1035

1036 **C.** Subspace overlap between a pair of conditions. S, M and L indicate short, medium and long TSDs, and 1  
1037 and 2 indicate the saccade plan number.

1038

1039

1040

1041

1042

1043

1044

1045

1046

1047

1048

1049

1050

1051

1052

1053

1054

1055

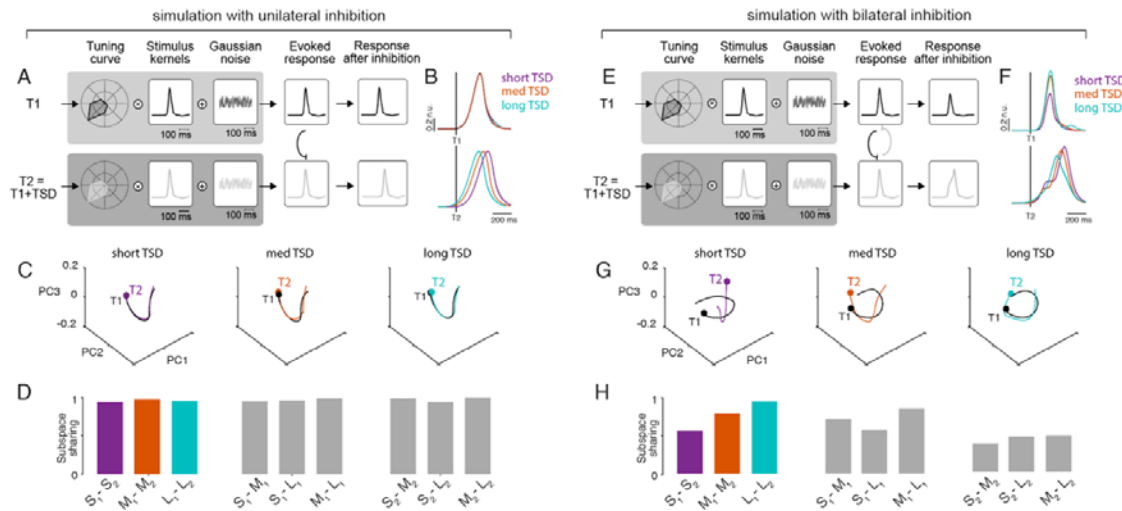

1056

1057 **Figure 5: Only simulations with bilateral, asymmetric inhibition capture the empirical**  
 1058 **data's population dynamics**

- 1059 **A.** Schematic of the simulation with bilateral inhibition. Top row: simulated neural activity for the  
 1060 first saccade plan and bottom row: simulated neural activity for the second saccade plan (see **Fig**  
 1061 **S6** and methods; n.u. = normalized unit).  
 1062 **B.** Normalized mean population neural responses, for data simulated with bilateral inhibition,  
 1063 aligned to target 1 and target 2 for short, medium and long TSD trials.  
 1064 **C.** First three PCs plotted against each other for target 1 (black) and target 2 (color) related responses  
 1065 for short (left), medium (center) and long (right) TSD trials. Filled circle markers indicate the starts  
 1066 of the respective trajectories.  
 1067 **D.** Subspace overlap between a pair of conditions. S, M and L indicate short, medium and long TSDs,  
 1068 and 1 and 2 indicate the plan number.  
 1069 **E.** Same as **A**, but for simulation with unilateral inhibition (see methods).  
 1070 **F.** Same as **B**, but for simulated data with unilateral inhibition.  
 1071 **G.** Same as **C**, but for simulated data with unilateral inhibition.  
 1072 **H.** Same as **D**, but for simulated data with unilateral inhibition.

1073  
 1074  
 1075  
 1076  
 1077  
 1078  
 1079  
 1080  
 1081  
 1082  
 1083

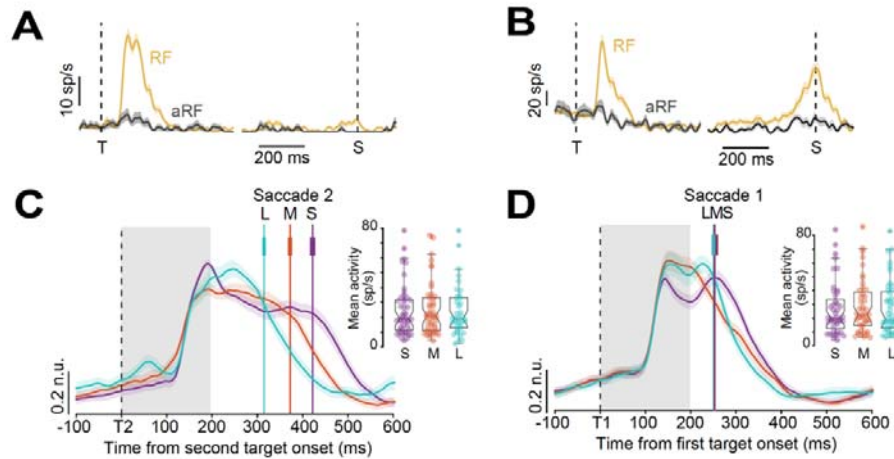

1084

1085

### Figure 6. Processing bottlenecks in FEF V and VM neurons

1086

1087

1088

1089

1090

1091

1092

1093

1094

1095

1096

1097

1098

1099

1100

1101

1102

1103

1104

1105

1106

1107

1108

1109

1110

1111

1112

1113

1114

1115

1116

1117

1118

- A. A representative FEF visual neuron aligned to target onset (T) and saccade onset (S) in a memory-guided task for saccades into the RF (yellow) and saccades out of RF (into aRF; black).
- B. A representative FEF vismov neuron aligned to target onset (T) and saccade onset (S) in a memory-guided task for saccades into the RF (yellow) and saccades out of RF (into aRF; black).
- C. FEF visual and vismov neuron population activity encoding for different TSD conditions (short, medium, long), aligned to target 2 onset. Mean saccade onset times for the TSD conditions are shown as vertical colored lines with s.e.m error bars. Inset: Kruskal-Wallis box plots for average activity in the visual epoch (gray shaded area) for the three TSDs. Shading indicates mean  $\pm$  SEM.
- D. Same as C but for neural activity aligned to target 1.

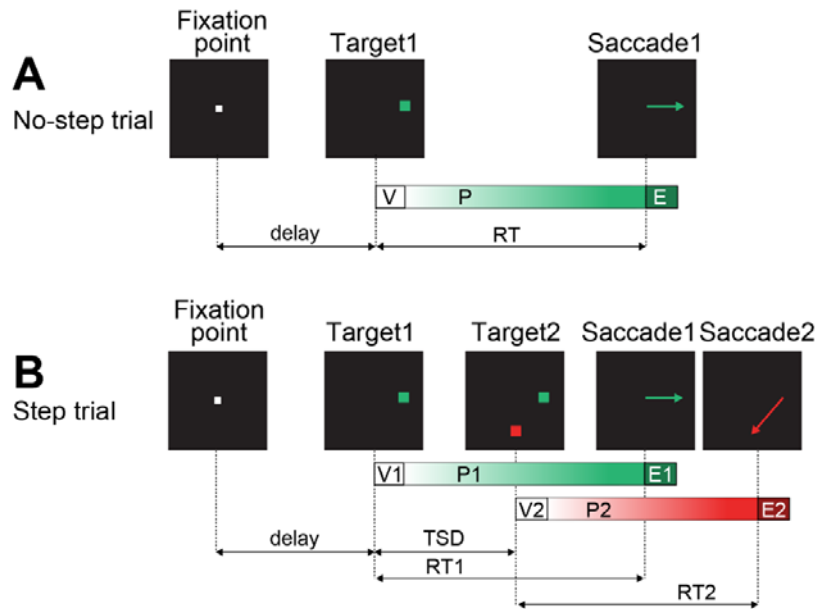

**Figure S1. Schematic of the FOLLOW task** (related to Fig 1)

1119  
1120  
1121  
1122  
1123  
1124  
1125  
1126  
1127  
1128  
1129  
1130  
1131  
1132  
1133

**A.** A representative no-step trial. The trial starts with the appearance of a central fixation point (FP), followed by the presentation of the green target (T1) at any one of the six possible peripheral locations. The monkey had to make a single saccade (S1) to the target to get a juice reward. In the representative framework, the processes leading to the culmination of a saccade are simplified to consist of three stages: visual encoding of stimuli (V), central planning (P), and saccade execution (E). RT refers to the reaction time.

**B.** A representative step trial. Similar to no-step trials, a step trial started with central fixation, after which a green target (T1) appeared. A second red target (T2) was then presented after T1. A variable delay separated the first and the second target onsets (target step delay; TSD). The monkey had to make a sequence of two saccades (S1, S2) to the two targets in order of their appearance to get rewarded in step trials. The abbreviations used are the same as in A, but for two saccades.

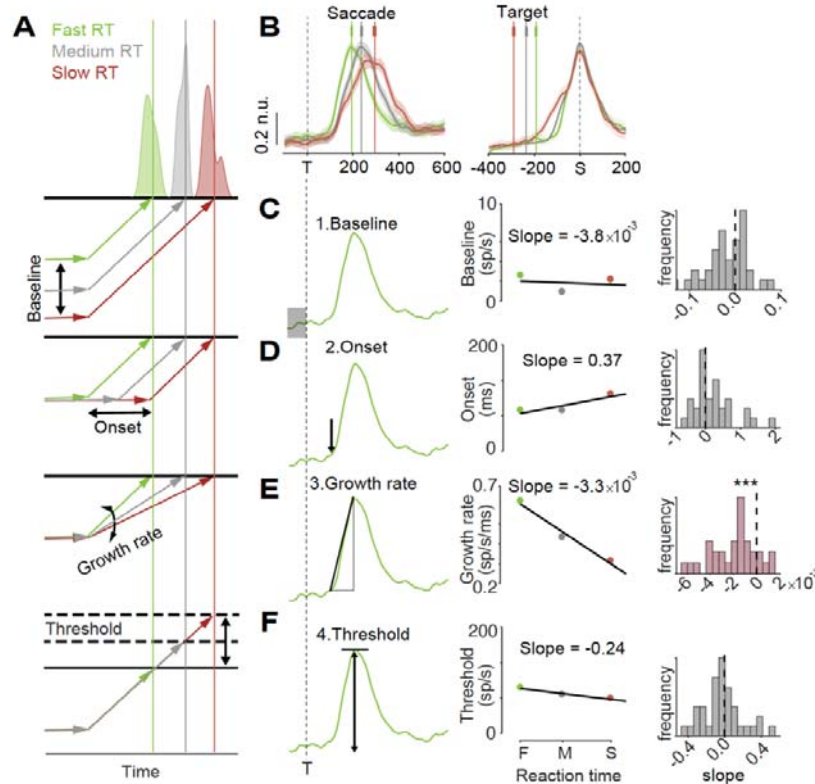

**Figure S2. Population activity of FEF movement neurons in no-step trials** (related to Fig 3)

1134  
1135  
1136  
1137  
1138  
1139  
1140  
1141  
1142  
1143  
1144  
1145  
1146  
1147  
1148  
1149  
1150  
1151  
1152  
1153  
1154  
1155  
1156  
1157  
1158  
1159  
1160  
1161  
1162  
1163  
1164

**A.** Schematic of possible adjustments of neural activity related to processing bottlenecks. The lengthening of the reaction time may be due to four possible adjustments according to accumulator dynamics. Each schematic shows a noise-free, simplistic accumulation process, starting from the baseline and reaching up to the threshold for saccade initiation. Representative reaction time distributions are plotted above each of the schematics. Lowering of baseline activity, delaying the onset of activity, slowing down the rate of growth, and increasing the threshold level can either singly or in combination, bring about increased reaction times.

**B.** Left: FEF movement neuron population activity encoding for different reaction times (short: green, medium: gray, long: red), aligned to target onset (vertical broken line). Mean saccade onset times for all the reaction time conditions are shown as vertical colored lines with s.e.m error bars. Right: same as left but activity aligned to saccade onset (vertical broken line). Shading indicates mean  $\pm$  SEM.

**C.** Illustration of the measurement of accumulator parameter: baseline. Left: Schematic of a spike density function of a representative neuron aligned to target onset showing the baseline value. Middle: The baseline was calculated for short, medium and long reaction times for a representative neuron and the slope of the best fit was calculated. Right: Histogram of distribution of slopes measured this way for all the neurons was compared with zero (vertical broken line).

**D.** Same as C but for measurement of onset.

**E.** Same as C but for measurement of growth rate.

**F.** Same as C but for measurement of threshold.

1165

1166

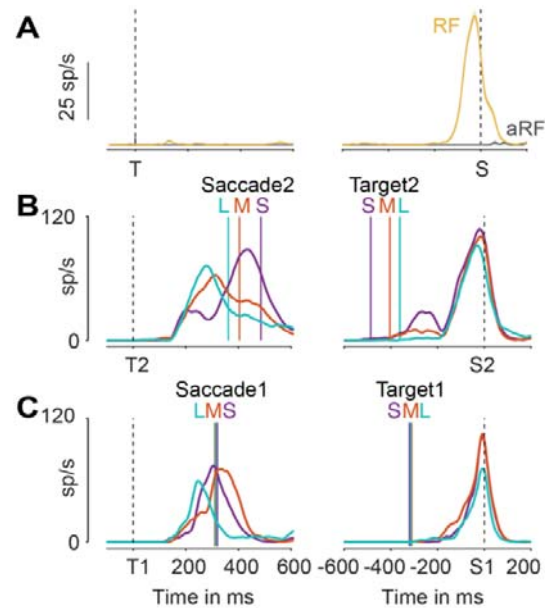

1167

1168

1169

**Figure S3: Single neuron example for processing bottlenecks** (related to Fig 3)

1170

1171

1172

1173

1174

1175

1176

1177

1178

1179

1180

1181

1182

1183

1184

1185

1186

1187

1188

1189

1190

1191

1192

1193

1194  
1195

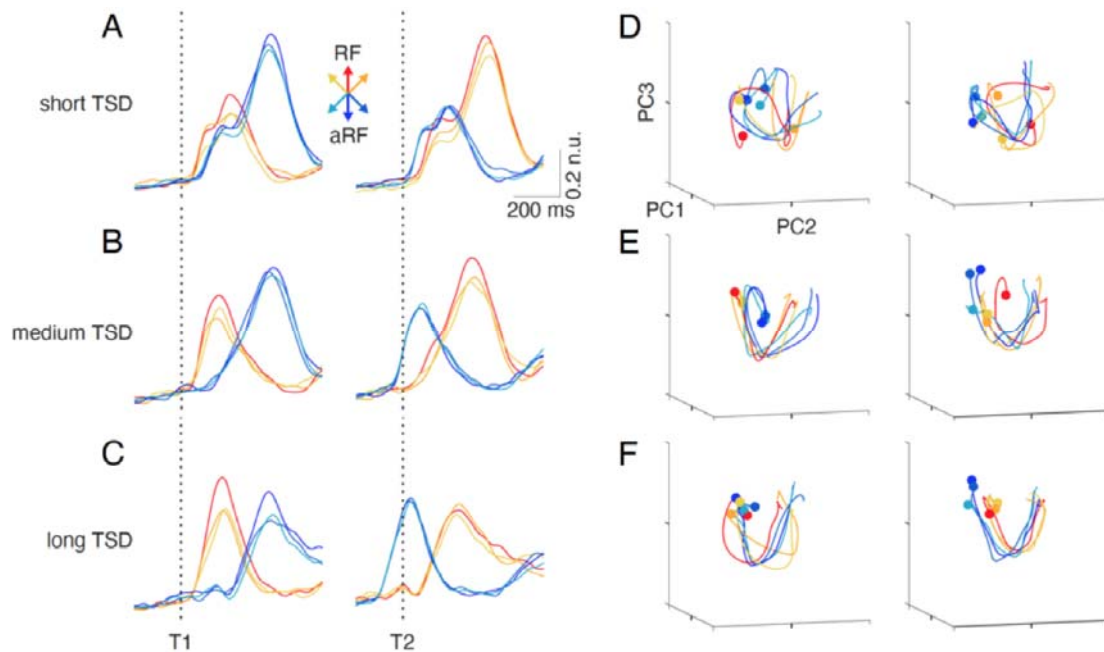

1196  
1197

1198

**Figure S4: Population dynamics for all target positions** (related to Fig 4)

1199  
1200  
1201  
1202  
1203  
1204  
1205  
1206  
1207  
1208  
1209  
1210  
1211  
1212  
1213  
1214  
1215

- A. Soft-normalized mean population neural responses towards all six target positions (3 towards RF, shown in warm colors and 3 out of RF, shown in cold colors; see inset for colors), aligned to target 1 (left) and target 2 (right) for short TSD trials (n.u. = normalized unit).
- B. Same as A, but for medium TSD trials.
- C. Same as A, but for long TSD trials.
- D. First three PCs for each target position shown in A, plotted against each other for target 1 (left) and target 2 (right) related responses for short TSD trials. Filled circle markers indicate the starts of the respective trajectories.
- E. Same as D, but for medium TSD trials shown in B.
- F. Same as D, but for long TSD trials shown in C.



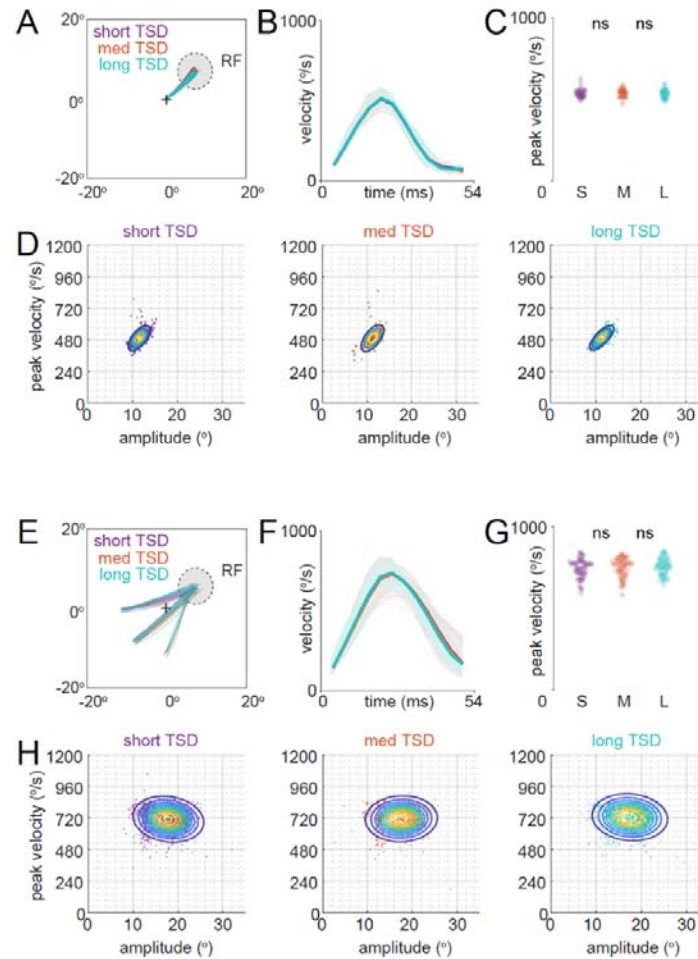

1216

1217

**Figure S5: Saccade kinematics with different TSDs** (related to Fig 4)

1218

A. Saccade 1 trajectories, towards RF (filled, broken circle), during short, medium and long TSD trials from a representative session. The central cross denotes the fixation point.

1219

B. Mean saccade 1 velocity profiles for short, medium and long TSD trials (thick lines) superimposed on saccade 1 velocity profiles from individual trials (thin lines). Shading indicates mean  $\pm$  SEM.

1220

C. Peak saccade 1 velocities from each session for short, medium and long TSD trials. P values: short-medium: 0.81, ranksum test; medium-long: 0.60, ranksum test.

1221

1222

1223

1224

D. Saccade 1 main sequence for short (left), medium (center) and long (right) TSD trials. The overlaid contours represent the density of data.

1225

E. Saccade 2 trajectories, towards RF (filled, broken circle), during short, medium and long TSD trials from the same representative session as A.

1226

F. Same as B, but for saccade 2.

1227

G. Same as C, but for saccade 2. P values: short-medium: 0.92, ranksum test; medium-long: 0.80, ranksum test.

1228

1229

1230

H. Same as D, but for saccade 2.

1231

1232

1233

1234

1235

1236

1237

1238

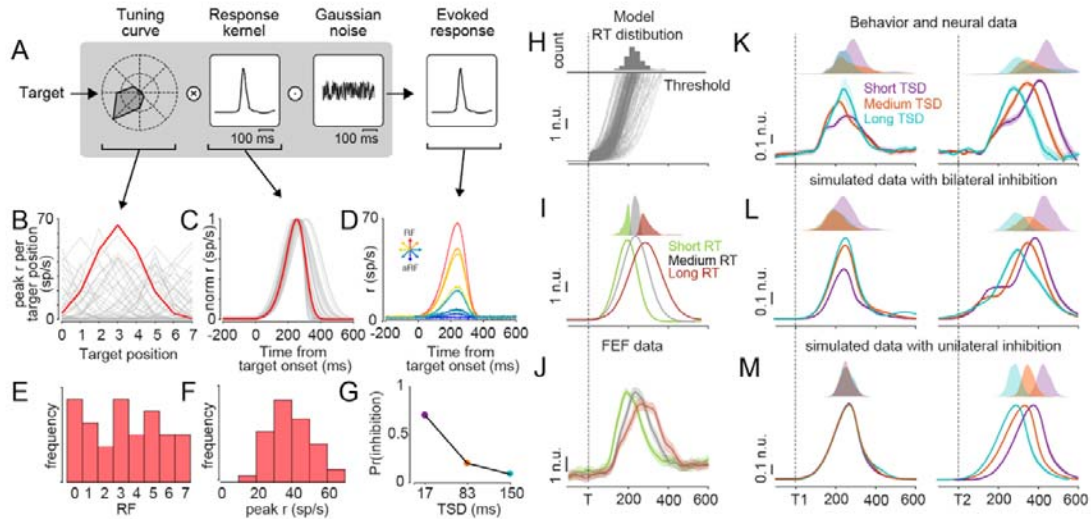

1239

1240 **Figure S6: Data simulation process, reaction time and neural activity profiles** (related to  
1241 *Fig 5*)

- 1242 **A.** Schematic illustration of the simulation.  
1243 **B.** Tuning curves (peak firing rates as a function of target positions) for all the simulated neurons.  
1244 One representative neuron's tuning curve is highlighted in purple.  
1245 **C.** Response kernels (activity as a function of time) for all the simulated neurons. Same representative  
1246 neuron's stimulus kernel is highlighted in purple.  
1247 **D.** Multiplication of tuning curves and stimulus kernels and addition of noise results in the  
1248 simulated neuron's activity for each of the 8 target positions. Activity towards the 8 target  
1249 positions is shown for the same representative neuron as above.  
1250 **E.** Distribution of RF positions (argmax(tuning curve)) of the simulated neurons shows a uniform  
1251 spread of RFs across the simulated neurons.  
1252 **F.** Distribution of peak firing rate (max(tuning curve)) of the simulated neurons shows a  
1253 unimodal distribution with a mean ~ 37 sp/s.  
1254 **G.** Probability of inhibition as a function of TSD  
1255 **H.** Bottom: Example simulation for one session, for RF position, following the simulation pipeline  
1256 shown in A. Top: reaction time distribution obtained from the simulation.  
1257 **I.** Top: The same reaction time distribution from H, but uniformly divided into fast, medium and  
1258 slow reaction times. Bottom: Average neural activity from the simulation in H, divided into fast,  
1259 medium and slow reaction time conditions as explained above.  
1260 **J.** Same FEF neural data from **Fig S2B** (divided into fast, medium and slow reaction time).  
1261 **K.** Top: reaction time distributions of two monkeys for short, medium and long TSD trials for plan 1  
1262 (left) and plan 2 (right). Bottom: Same as **Fig 3C**; right: Same as **Fig 3A**.  
1263 **L.** Top: reaction time distributions from the simulations with bilateral inhibition in the same format as  
1264 above. Bottom: Same as **Fig 5F**.  
1265 **M.** Top: reaction time distributions from the simulations with unilateral inhibition in the same format  
1266 as above. Bottom: Same as **Fig 5B**.  
1267  
1268  
1269  
1270  
1271
